# Supplementary material
Source: Springer Nature journal article supplement (https://www.springermedizin.de/resource/supplementary/13256_2011_1792_MOESM2_ESM.pdf/9648500)

5/3.2

L

3.04

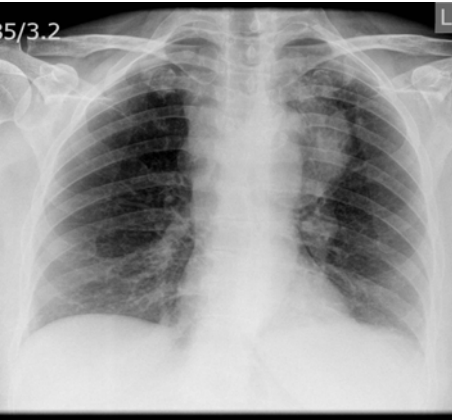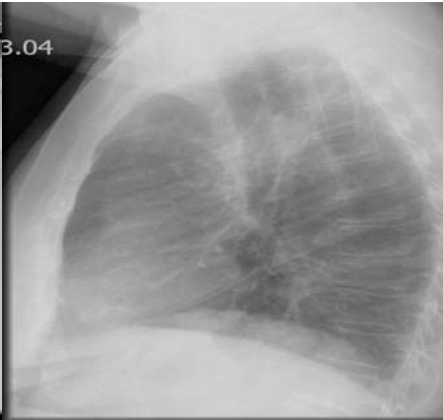

Supplement: MOESM2 [file 9648500]
